# Supplementary material for: NOX2 inhibition reduces oxidative stress and prolongs survival in murine KRAS-induced myeloproliferative disease
Source: PubMed Central journal article supplement (PMC6372471; doi:10.1038/s41388-018-0528-1), 2018-10-15
Supplement: 41388_2018_528_MOESM1_ESM.pdf [file 41388_2018_528_MOESM1_ESM.pdf]

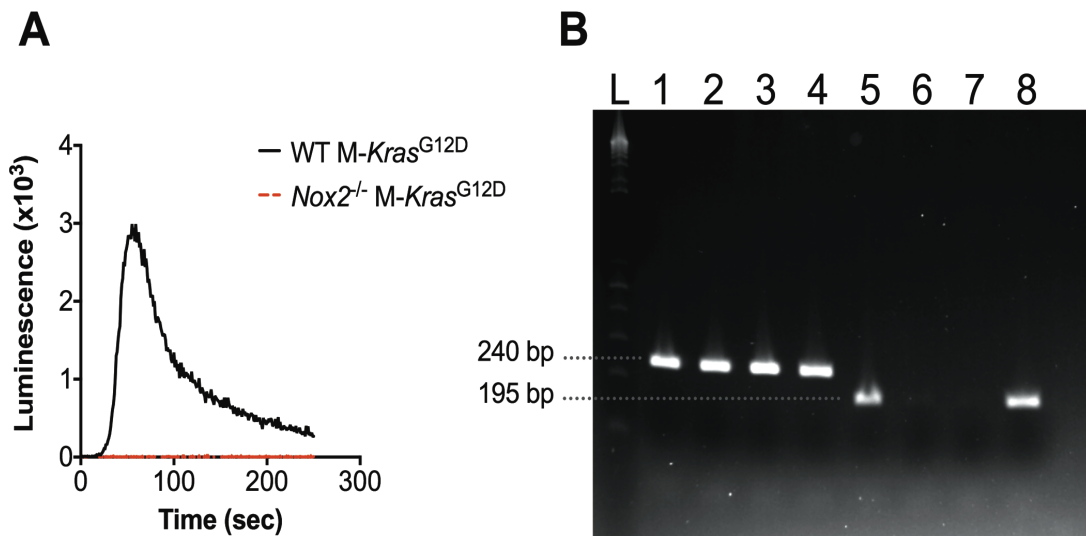

**Supplementary Fig. 1. Triple transgenic *Nox2*<sup>-/-</sup> M-Kras<sup>G12D</sup> mice are devoid of ROS production.** (A) ROS production measured by chemiluminescence in splenic Gr1<sup>+</sup> cells isolated from WT or *Nox2*<sup>-/-</sup> M-Kras<sup>G12D</sup> mice following WKYMVm (10<sup>-7</sup> M) stimulation. (B) Gel picture showing presence of *Nox2* in WT mice (lanes 1-4), presence of mutant *Nox2* in *Nox2*<sup>-/-</sup> M-Kras<sup>G12D</sup> mice (lanes 5 and 8) and absence of WT *Nox2* in *Nox2*<sup>-/-</sup> M-Kras<sup>G12D</sup> mice (lanes 6 and 7), as measured by PCR on peripheral blood.
