# Supplementary material for: NOX2 inhibition reduces oxidative stress and prolongs survival in murine KRAS-induced myeloproliferative disease
Source: PubMed Central journal article supplement (PMC6372471; doi:10.1038/s41388-018-0528-1), 2018-10-15
Supplement: 41388_2018_528_MOESM2_ESM.pdf [file 41388_2018_528_MOESM2_ESM.pdf]

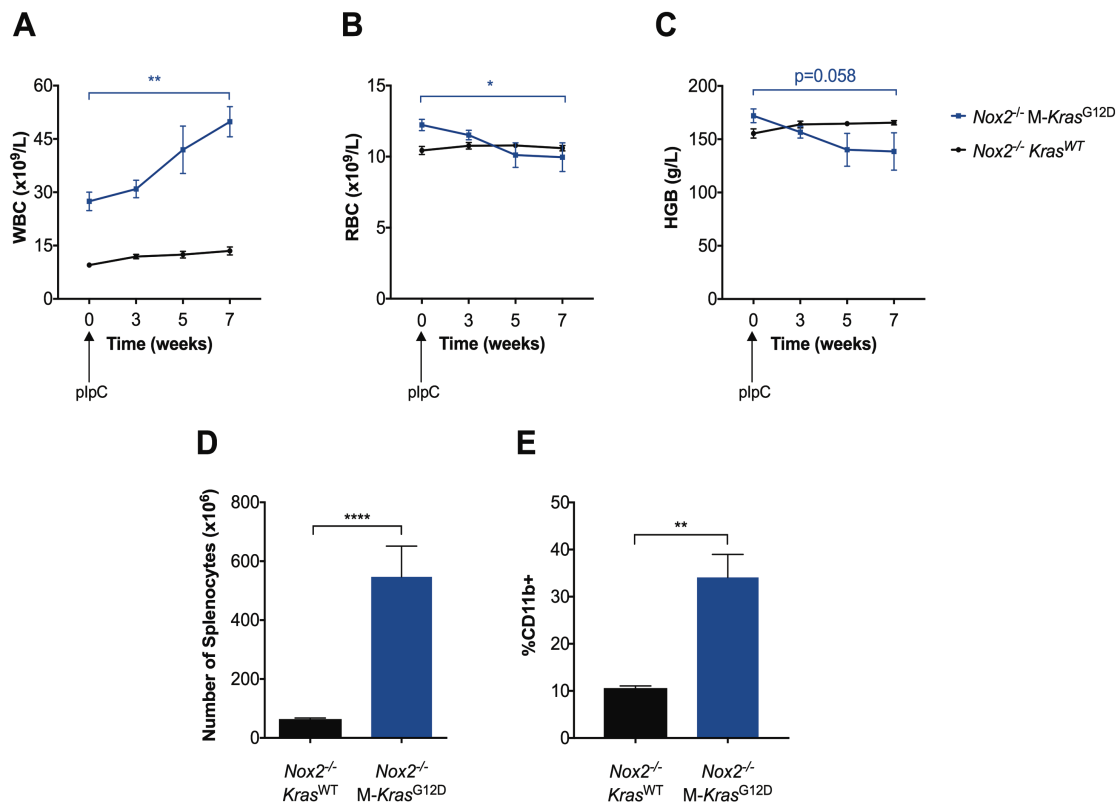

**Supplementary Fig. 2. Characterization of  $LSL-Kras^{G12D} \times Mx1-Cre$ -induced leukemia in  $Nox2^{-/-}$  mice.** (A-C)  $Nox2^{-/-}$ - $LSL-Kras^{G12D} \times Nox2^{-/-}$ - $Mx1-Cre$  ( $Nox2^{-/-}$  M- $Kras^{G12D}$ ; blue lines) mice and wild-type ( $Nox2^{-/-}$   $Kras^{WT}$ ; black lines) mice were injected with pIpC at the time point  $w_0$ . Peripheral blood was collected at 3, 5 and 7 weeks (w3-7) after pIpC injection. The peripheral blood of  $Nox2^{-/-}$  M- $Kras^{G12D}$  mice showed a progressive increase in white blood cell (WBC) counts (A), along with a reduction of red blood cell (RBC) counts (B) and hemoglobin levels (C;  $n=8$  for  $Nox2^{-/-}$   $Kras^{WT}$  at each time point,  $n=8$  for  $Nox2^{-/-}$  M- $Kras^{G12D}$  at each time point except  $n=2$  at w7). (D) Number of splenocytes isolated from endpoint  $Nox2^{-/-}$  M- $Kras^{G12D}$  mice (blue,  $n=6$ ). The splenocyte counts from  $Nox2^{-/-}$   $Kras^{WT}$  mice (black,  $n=6$ ) are shown for comparison ( $t$ -test). (E) Frequency of CD11b<sup>+</sup>-infiltrating cells among live cells in the spleens of endpoint  $Nox2^{-/-}$  M- $Kras^{G12D}$  mice (blue,  $n=5$ ) and  $Nox2^{-/-}$   $Kras^{WT}$  mice (black,  $n=5$ ) ( $t$ -test). \* $p < 0.05$ , \*\* $p < 0.01$ , \*\*\* $p < 0.001$ .
