# Supplementary material for: NOX2 inhibition reduces oxidative stress and prolongs survival in murine KRAS-induced myeloproliferative disease
Source: PubMed Central journal article supplement (PMC6372471; doi:10.1038/s41388-018-0528-1), 2018-10-15
Supplement: 41388_2018_528_MOESM3_ESM.pdf [file 41388_2018_528_MOESM3_ESM.pdf]

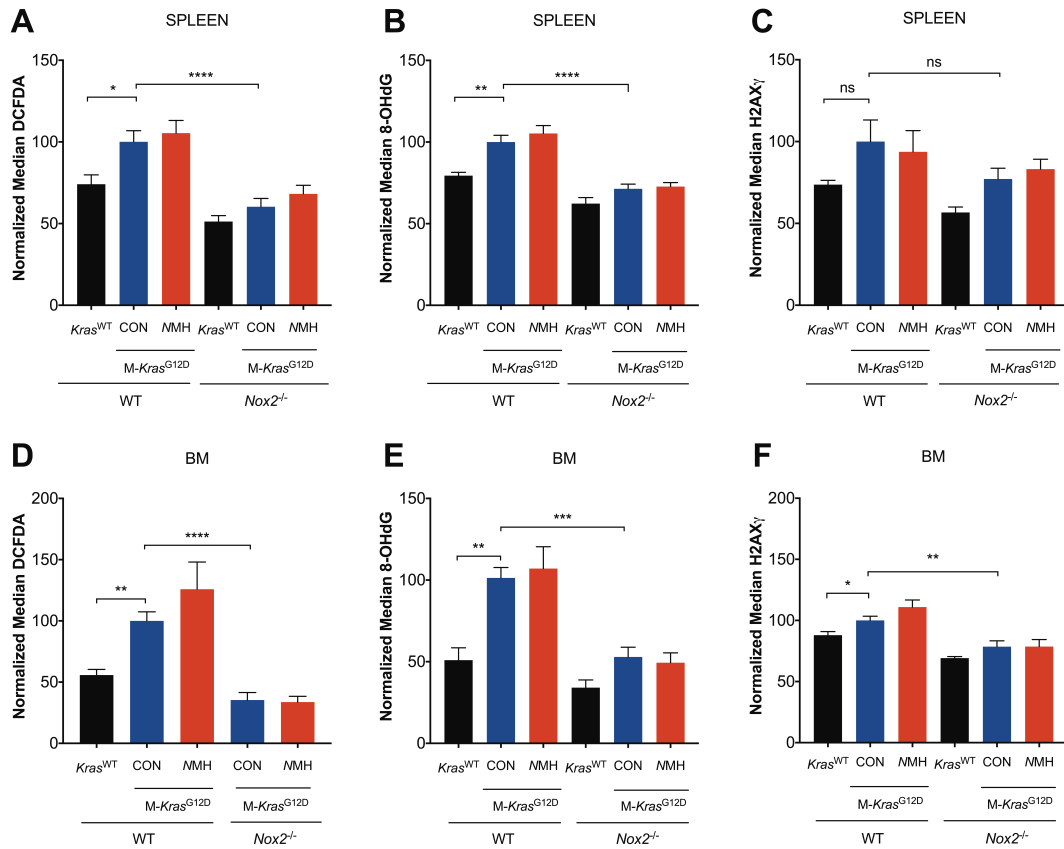

**Supplementary Fig. 3. Oxidative stress, DNA oxidation and DSB levels in the**

**BMs and spleens at the endpoint. (A-F) Expression of mutated *Kras* in**

hematopoietic cells was induced in double ( $M-Kras^{G12D}$ ) and triple ( $Nox2^{-/-}M-Kras^{G12D}$ ) transgenic mice by pIpC injections. Mice were treated with NMH (250  $\mu$ g/mouse; red) or NaCl (CON; blue) i.p. thrice weekly for 5 weeks. When moribund, spleen (A-C) and bone marrow (D-F) cells were collected from them  $M-Kras^{G12D}$  and  $Nox2^{-/-}M-Kras^{G12D}$  mice and analyzed for (A and D) DCFDA expression in CD11b<sup>+</sup> cells (B and E) 8-OHdG expression and (C and F) gamma-H2AX expression in myeloid cells (for spleens: n=8 for  $Kras^{WT}$ , n=12 for  $M-Kras^{G12D}$ , n=8 for  $Nox2^{-/-}Kras^{WT}$ , n=7-8 for  $Nox2^{-/-}M-Kras^{G12D}$ ; for BMs: n=4-7 for  $Kras^{WT}$ , n=8-12 for  $M-Kras^{G12D}$ , n=3 for  $Nox2^{-/-}Kras^{WT}$ , n=5-6 for  $Nox2^{-/-}M-Kras^{G12D}$ ). Student's *t*-test.

\* $p < 0.05$ , \*\* $p < 0.01$ , \*\*\* $p < 0.001$ .
